# Supplementary material for: Sea Level Rise in Europe: Observations and projections
Source: Copernicus journal article supplement (doi:10.5194/sp-2023-36), 2023-12-12
Supplement: Supplementary file [file sp-2023-36-AC5-supplement.pdf]

## **Comment #2 Sergiu D. Rosen**

This is my second comment to the article preview discussion.

1st, I found a misspelling in my previous, whereas in place of decade it should be decades.

Thanks, noted.

2nd Another point forgot to mention is that due to SLR induced flooding. Due to SLR and particularly during extreme sea levels, the flow gradients of the rivers will decrease, potentially leading to increased floods. I believe this should be mentioned in the article.

Compound sea level and fluvial flooding is addressed in a companion paper:

van de Wal, R. S. W., Melet, A., Bellafiore, D., Vousdoukas, M., Camus, P., Ferrarin, C., Oude Essink, G., Haigh, I. D., Lionello, P., Luijendijk, A., Toimil, A., and Staneva, J.: Sea Level Rise in Europe: Impacts and consequences, *State Planet Discuss.* [preprint], <https://doi.org/10.5194/sp-2023-38>, in review, 2023.
