# Supplementary material for: Sea Level Rise in Europe: Observations and projections
Source: Copernicus journal article supplement (doi:10.5194/sp-2023-36), 2023-12-12
Supplement: Supplementary file [file sp-2023-36-AC6-supplement.pdf]

## COMMUNITY COMMENT

Dear Authors,

I extend my heartfelt congratulations to all of you for your outstanding collaborative work on the comprehensive analysis of sea level rise in Europe. Your research delves into crucial aspects of sea level rise due to climate change in future projections, and it is indeed an excellent contribution to the field.

I would like to bring to your attention that we recently published a paper specifically focusing on sea level rise in the Thrace Peninsula area, utilizing data from the IPCC report. While I noticed your mention of Marmara Sea level rise in your preprint, I believe there is still more to explore and emphasize regarding Marmara SLR. This region is home to over 20 million people, and their livelihoods depend on various aspects of the sea. More than half of the population resides in the vicinity of coastal areas, making it a critical area for in-depth investigation.

For further insights into our recent work, you can find our freshly published paper in Remote Sensing here:

[https://www.researchgate.net/publication/376110912\\_Coastal\\_Vulnerability\\_Assessment\\_of\\_Thrace\\_Peninsula\\_Implications\\_for\\_Climate\\_Change\\_and\\_Sea\\_Level\\_Rise](https://www.researchgate.net/publication/376110912_Coastal_Vulnerability_Assessment_of_Thrace_Peninsula_Implications_for_Climate_Change_and_Sea_Level_Rise)

Once again, congratulations on your remarkable work, and thank you for your significant contributions to the field. I wish you continued success in your research endeavors.

Best regards,

Mehmet Ozdes

Many thanks for your feedback.

The current paper on sea level rise in Europe does not go into as many details as your study does. To be consistent in the level of information provided across the paper, we therefore just added one sentence (before section “6.4.3. Vertical land motion”):

*“In their study on the Thrace Peninsula in Turkey, a vulnerable area to SLR bordered by the Marmara, Aegean and Black Seas, Ozsahin et al. (2023) recommend using local mean SL measurements. As highlighted by Kopp et al. (2014), this reflects the need for specific SLR information to generate more accurate projections of SLR.”*

Kopp, R.E.; Horton, R.M.; Little, C.M.; Mitrovica, J.X.; Oppenheimer, M.; Rasmussen, D.J.; Strauss, B.H.; Tebaldi, C. Probabilistic 21st and 22nd Century Sea-Level Projections at a Global Network of Tide-Gauge Sites. *Earth’s Future*, 2, 383-406, <https://doi.org/10.1002/2014EF000239>, 2014.

Ozsahin, E.; Ozdes, M.; Ozturk, M.; Yang, D. Coastal Vulnerability Assessment of Thrace Peninsula: Implications for Climate Change and Sea Level Rise. *Remote Sens.*, 15, 5592. <https://doi.org/10.3390/rs15235592>, 2023.
